# Supplementary material for: Mesenchymal Stem Cells and Begacestat Mitigate Amyloid-β 25–35-Induced Cognitive Decline in Rat Dams and Hippocampal Deteriorations in Offspring
Source: MDPI journal article supplement (doi:10.3390/biology12070905), 2023-06-25
Supplement: s1 [file s1]

**PND7**  
**Replicate 1**  
**APP**  
**p-Tau**

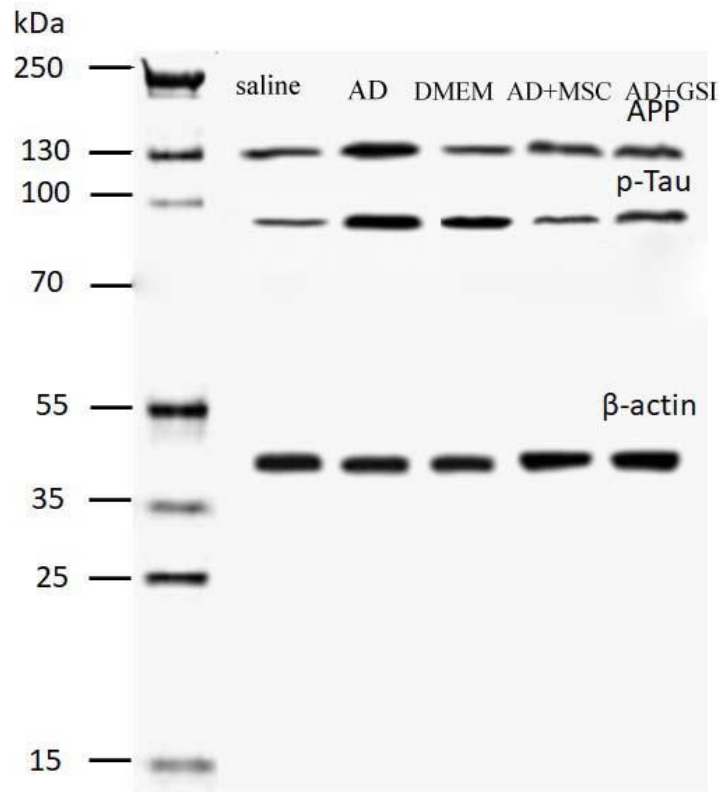

Figure S1: Original immunoblot (replicate 1) of **APP** and **p-Tau** of hippocampus at **PND7**

**PND14**  
**Replicate 1**  
**APP**  
**p-Tau**

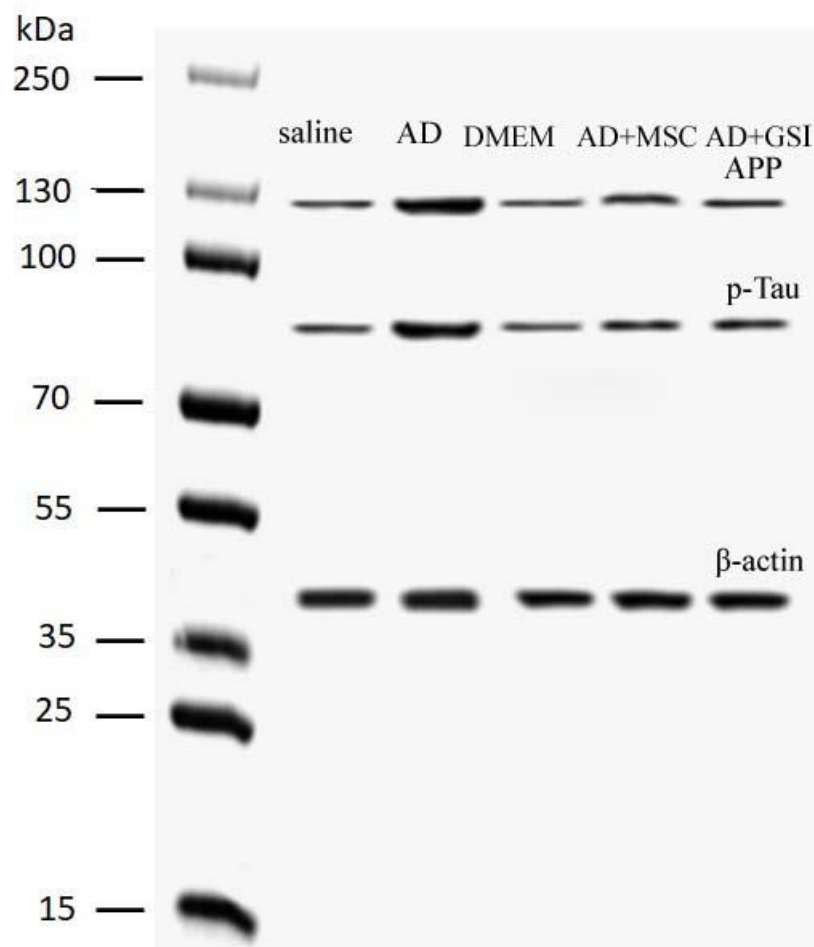

Figure S2: Original immunoblot (replicate 1) of APP and p-Tau of hippocampus at PND14

**PND21**  
**Replicate 1**  
**APP**  
**p-Tau**

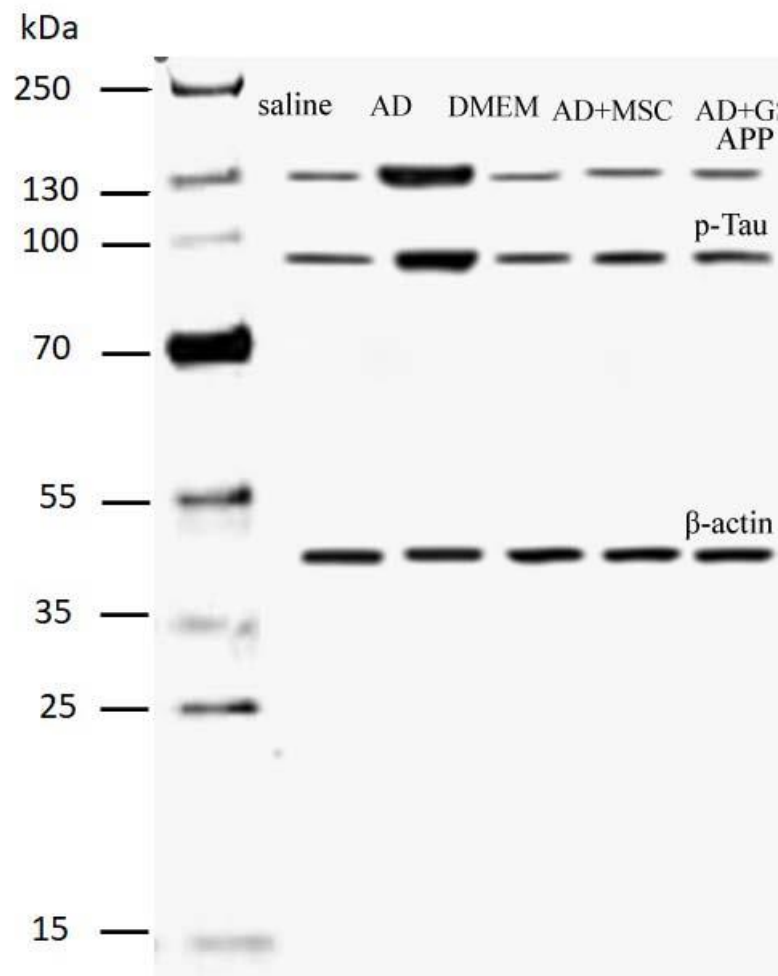

Figure S3: Original immunoblot (replicate 1) of APP and p-Tau of hippocampus at PND21
